# Supplementary material for: A flexible and conductive metallic paper-based current collector with energy storage capability in supercapacitor electrodes
Source: Royal Society of Chemistry journal article supplement (doi:10.1039/c9dt01066a), 2019-01-01
Supplement: c9dt01066a1.pdf [file c9dt01066a1.pdf]

## Supporting Information

### Flexible and Conductive Metallic Paper-based Current Collector with Energy Storage

#### Capability in Supercapacitor Electrodes

Yaoyin Li<sup>a,b,c</sup>, Qiyuan Wang<sup>a,b,c</sup>, Yong Wang<sup>a,b,c</sup>, Mingjun Bai<sup>d</sup>, Jian Shao<sup>a,b,c</sup>, Hongjun Ji<sup>a,b,c</sup>,  
Huanhuan Feng<sup>a,b,c</sup>, Jiaheng Zhang<sup>a,b,c</sup>, Xing Ma<sup>a,b,c</sup> and Weiwei Zhao<sup>a,b,c,\*</sup>

<sup>a</sup>Flexible Printed Electronics Technology Center, Harbin Institute of Technology, Shenzhen, 518055, P. R. China

<sup>b</sup>State Key Laboratory of Advanced Welding and Joining, Harbin Institute of Technology, Shenzhen, 518055, P. R.China

<sup>c</sup>School of Materials Science and Engineering, Harbin Institute of Technology, Shenzhen, 518055, P. R. China

<sup>d</sup>School of Materials Science and Engineering, Central South University, Changsha, Hunan 410083, P. R. China

\* Corresponding author. E-mail: [wzhao@hit.edu.cn](mailto:wzhao@hit.edu.cn)

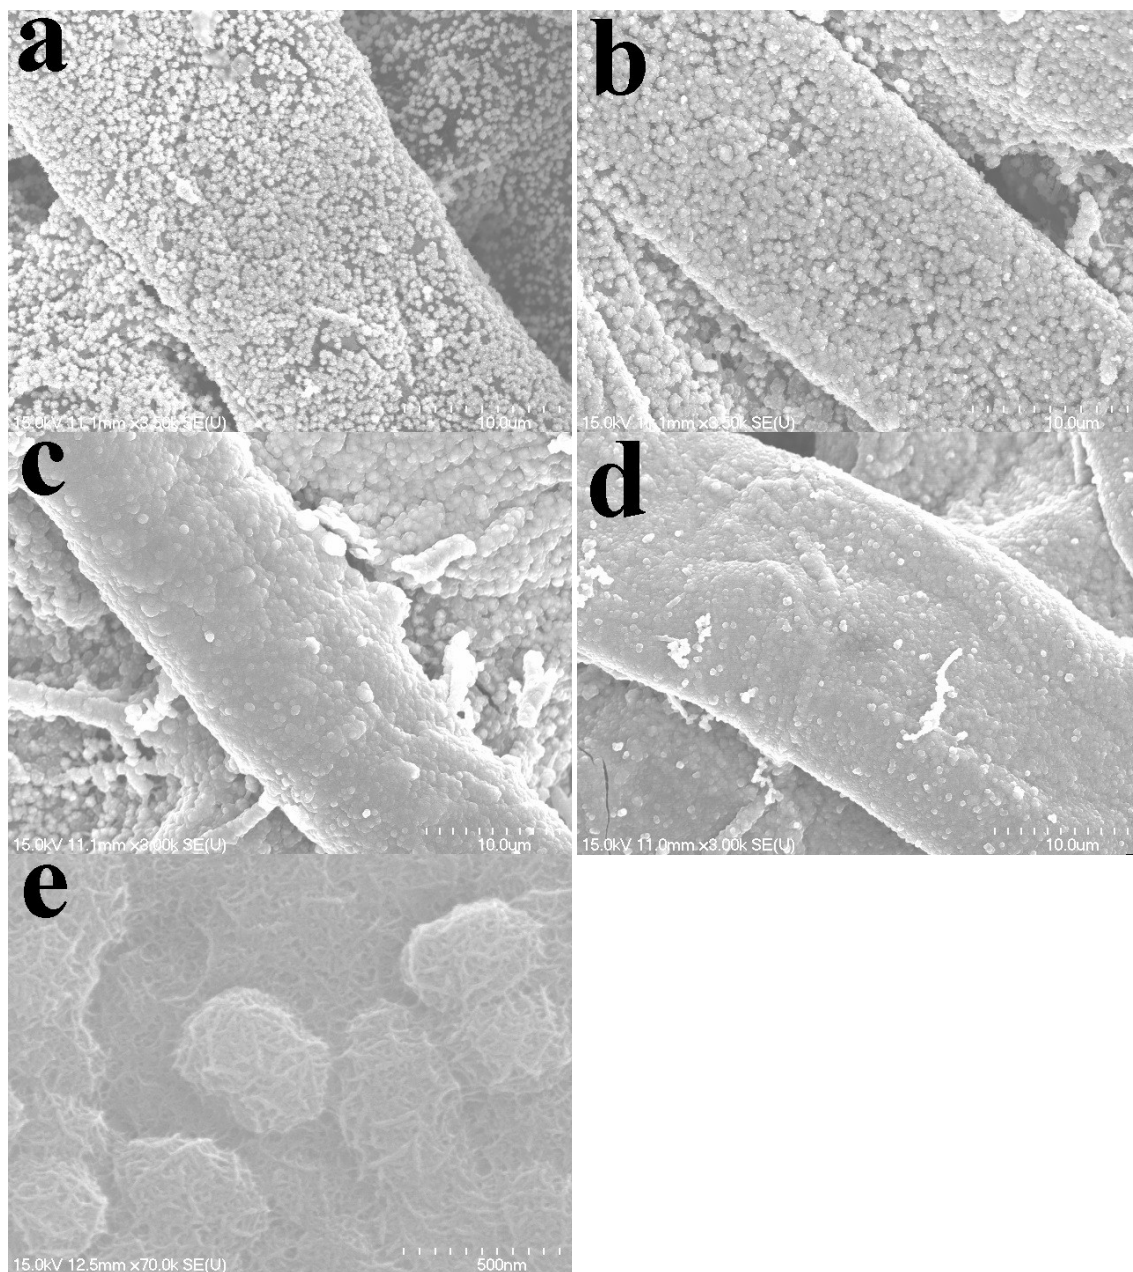

Figure S1. SEM images of Ni-paper-MnO<sub>2</sub> electrodes with different soaking time: (a) 5 min; (b) 10 min; (c) 20 min; (d) 30 min; (e) 30 min (high magnification).

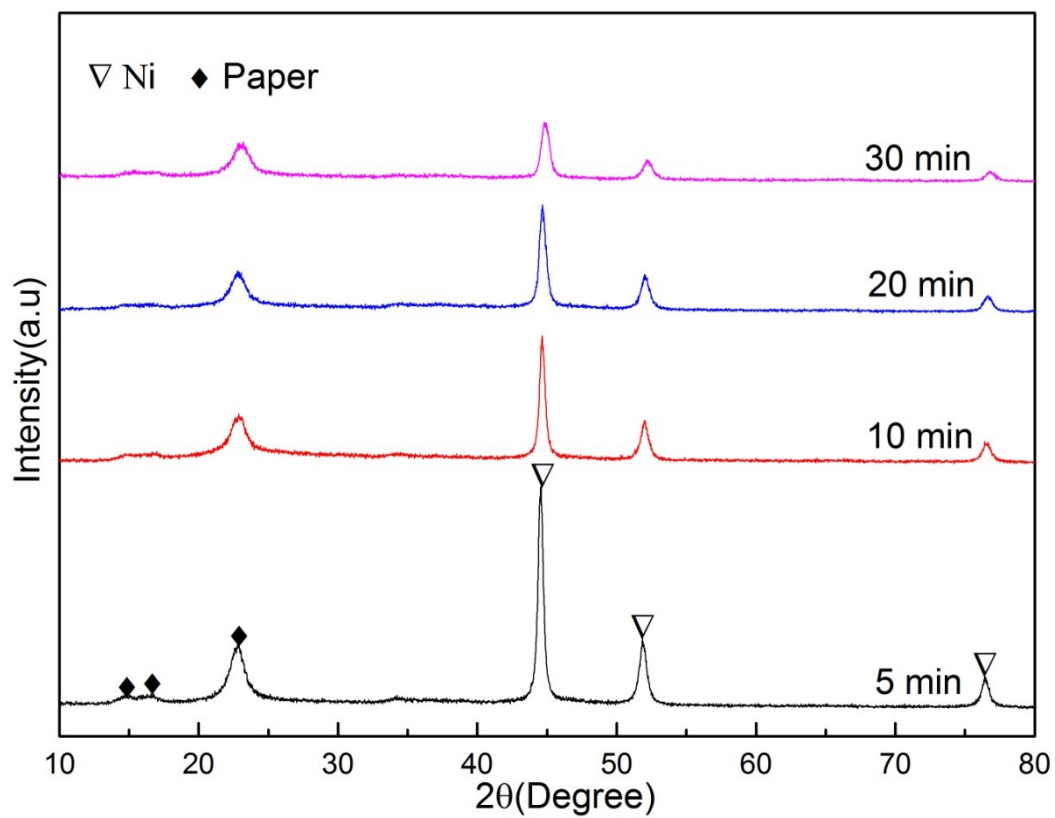

Figure S2. XRD patterns of Ni-paper-MnO<sub>2</sub> electrodes with different soaking time.

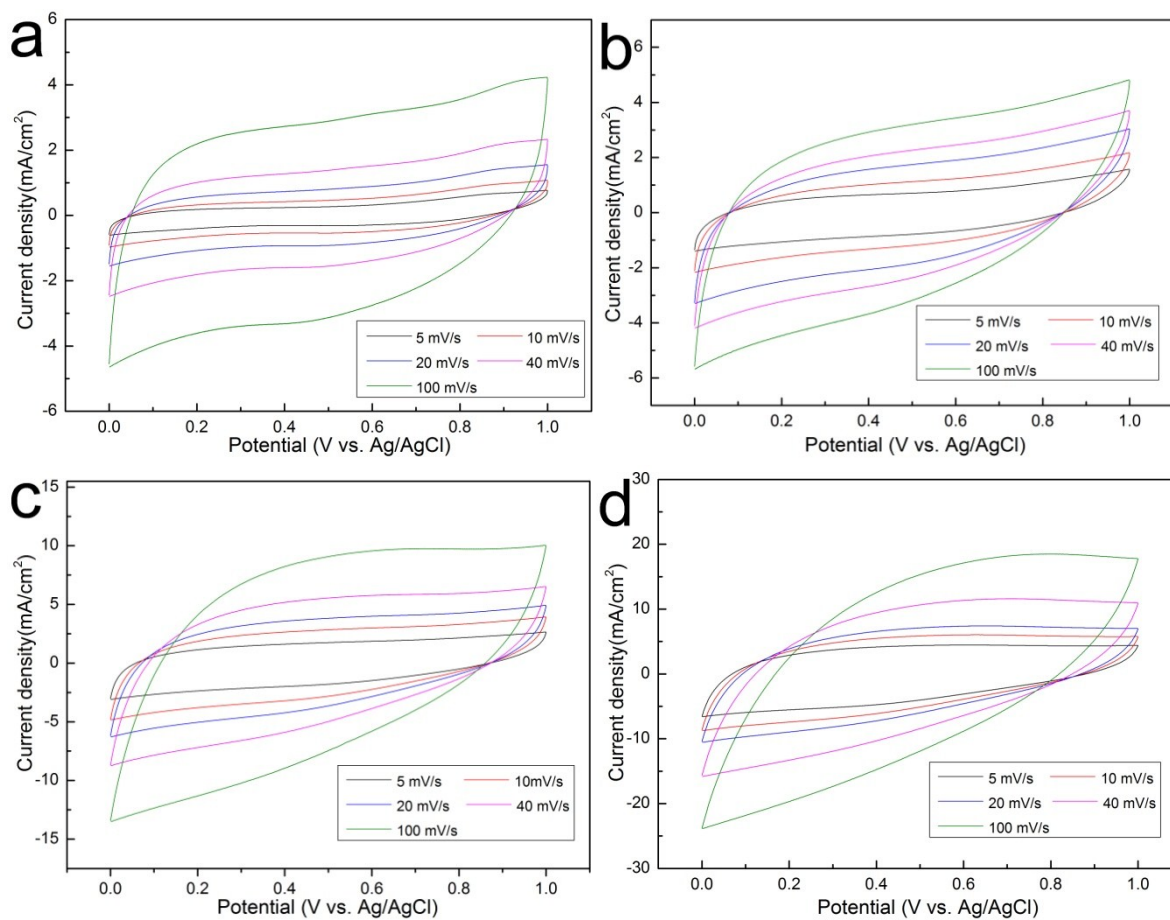

Figure S3. CV curves of Ni-paper-MnO<sub>2</sub> electrodes: (a) Ni-paper-5;(b) Ni-paper-10;(c) Ni-paper-20;(d) Ni-paper-30.

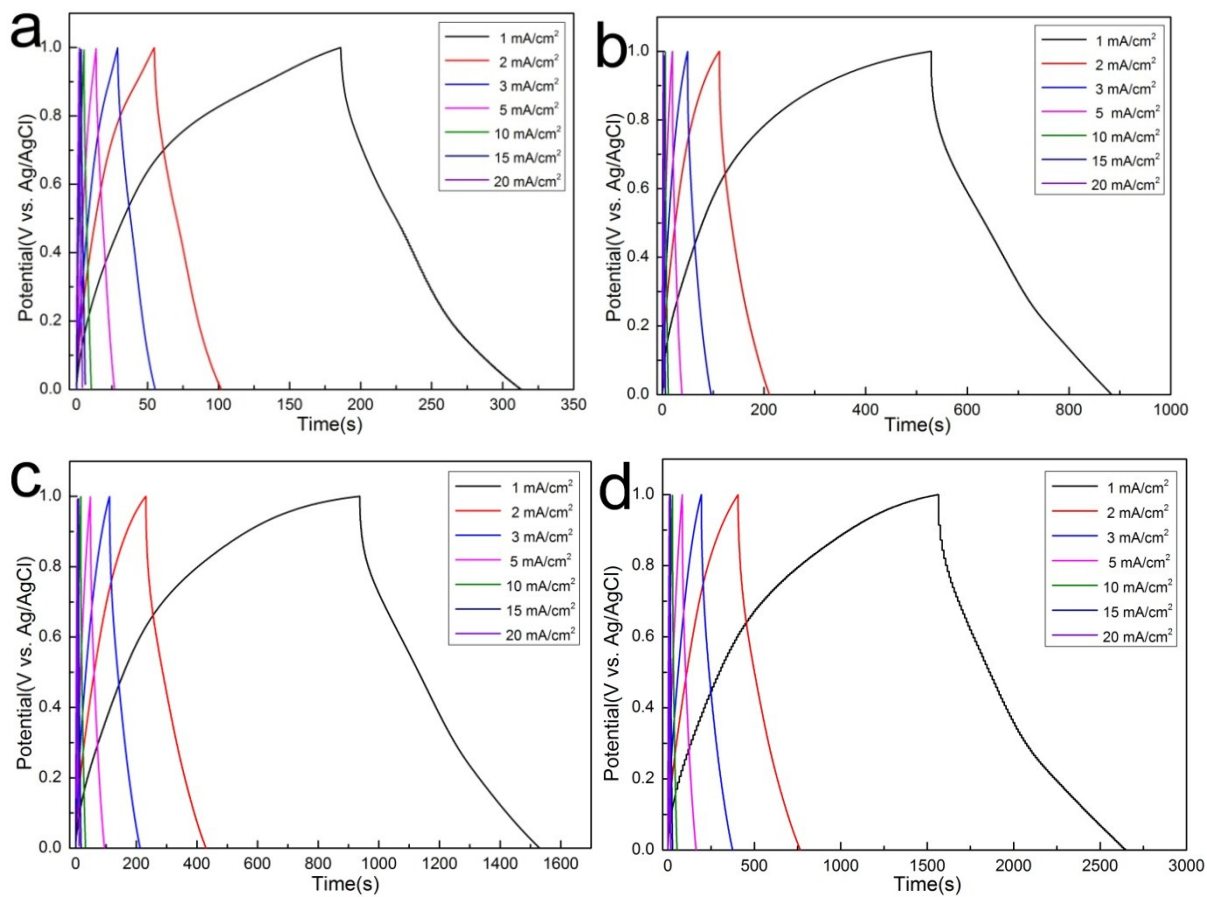

Figure S4. GCD curves of Ni-paper-MnO<sub>2</sub> electrodes: (a) Ni-paper-5;(b) Ni-paper-10;(c) Ni-paper-20;(d) Ni-paper-30.

Table.S1 Comparison of as prepared supercapacitor with some reported supercapacitors.

| Materials                                | Current collector | Electrolyte                          | Capacitance                                                           | Stability (cycles) | Ref.      |
|------------------------------------------|-------------------|--------------------------------------|-----------------------------------------------------------------------|--------------------|-----------|
| MnO <sub>2</sub> nanostructure           | Graphite foam     | 1M Na <sub>2</sub> SO <sub>4</sub>   | 201 F/g (1A/g)                                                        | 96.7% (1000)       | S1        |
| MnO <sub>2</sub>                         | Graphite fiber    | 1M Na <sub>2</sub> SO <sub>4</sub>   | 245 F/g (1A/g)                                                        | 80% (1000)         | S2        |
| MnO <sub>2</sub> nanowires               | PVDF membrane     | 0.5M Na <sub>2</sub> SO <sub>4</sub> | 118 F/g (200 mV/s)                                                    | 95.3% (1000)       | S3        |
| MnO <sub>2</sub> nanorods                | Carbon nanofibers | 1M Na <sub>2</sub> SO <sub>4</sub>   | 291 F/g (1A/g)                                                        | 90.9% (5000)       | S4        |
| MnO <sub>2</sub> nanoflowers             | Graphite paper    | 6%NH <sub>4</sub> HC O <sub>3</sub>  | 368.3 F/g (0.2A/g)                                                    | 98.4% (3000)       | S5        |
| MnO <sub>2</sub> nanosheets              | Carbon sphere     | 1M Na <sub>2</sub> SO <sub>4</sub>   | 231 F/g (0.5A/g)                                                      | 96% (1000)         | S6        |
| MnO <sub>2</sub> nanoparticle            | 3D graphene       | 1M Na <sub>2</sub> SO <sub>4</sub>   | 324 F/g (0.4A/g)                                                      | 91.1% (5000)       | S7        |
| MnO <sub>2</sub> /reduced graphene oxide | Ni fibers         | 1M Na <sub>2</sub> SO <sub>4</sub>   | 119.4 mF/cm <sup>2</sup> (0.5mA/cm <sup>2</sup> )                     |                    | S8        |
| MnO <sub>2</sub> nanorods                | Porous carbon     | 6M KOH                               | 196.2 F/g (1A/g)                                                      | 78.5% (5000)       | S9        |
| MnO <sub>2</sub> nanosheets              | Carbon fibers     | 1M Na <sub>2</sub> SO <sub>4</sub>   | 115.3 F/g (0.5A/g)                                                    | 85.6% (2000)       | S10       |
| MnO <sub>2</sub>                         | Ni Paper          | 1M Na <sub>2</sub> SO <sub>4</sub>   | 1095 mF/cm <sup>2</sup> (1 mA/cm <sup>2</sup> )<br>352 F/g (0.33 F/g) | 73% (2000)         | This work |

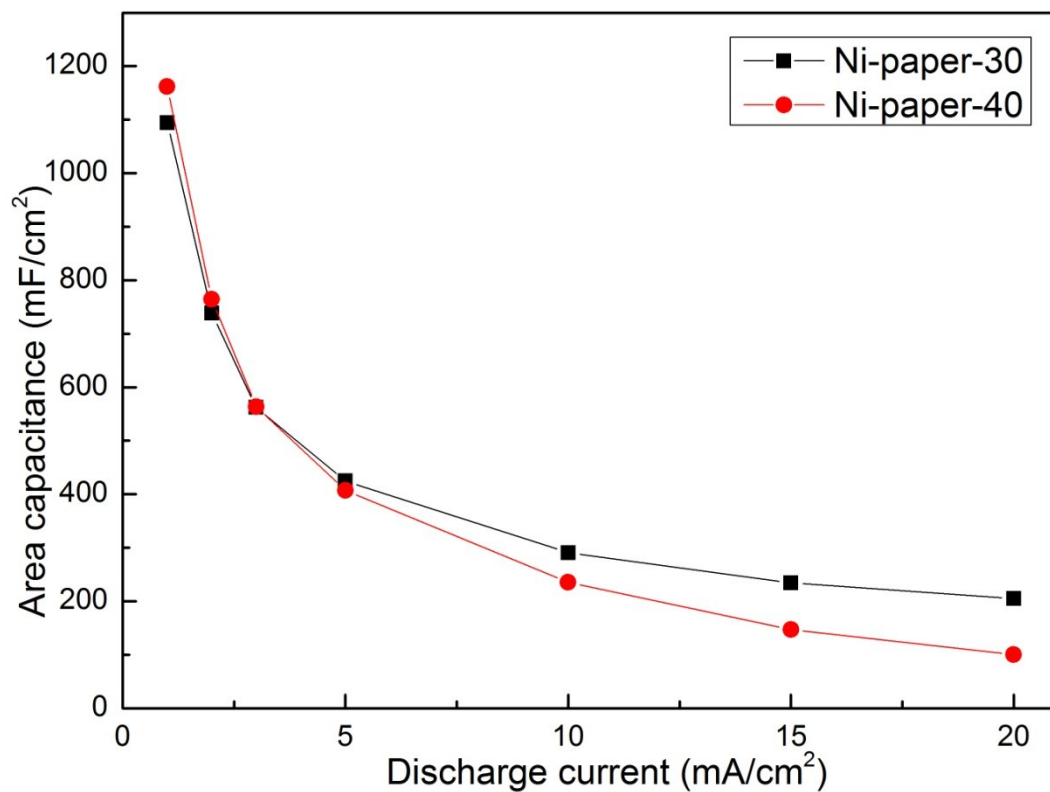

Figure S5. Areal specific capacitance measured at different current densities in the potential range of 0–1.0 V for Ni-paper-30 and Ni-paper-40.

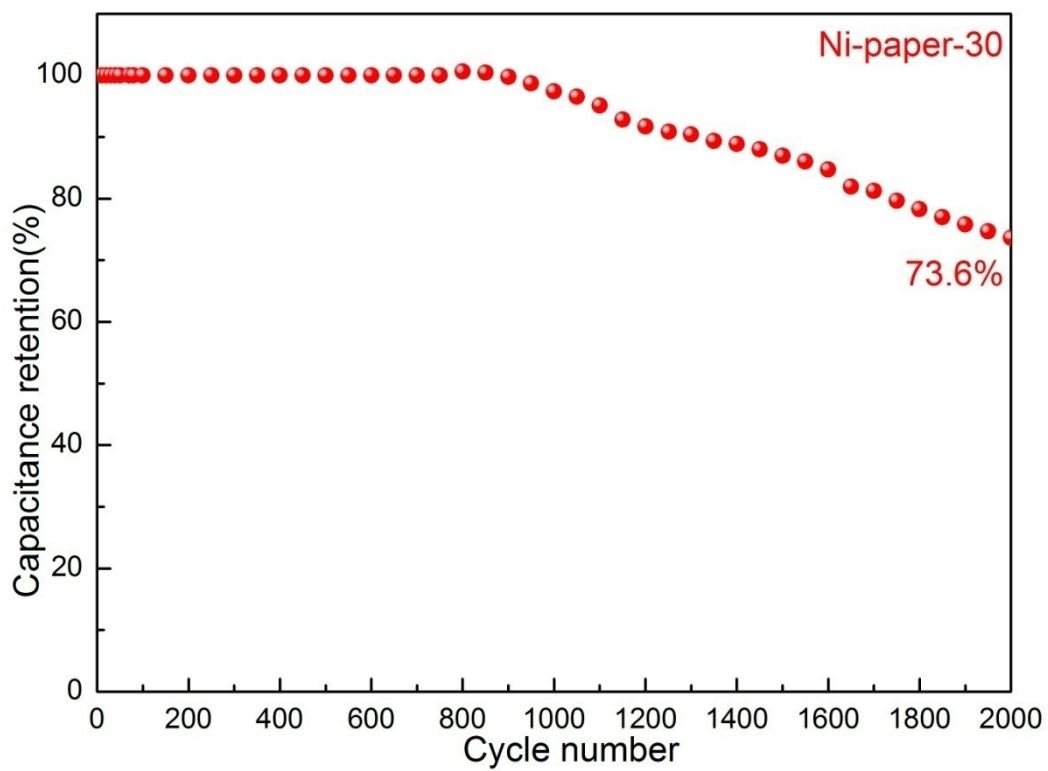

Figure S6. Cycling stability of the Ni-paper-30 at a current density of 10 mA/cm<sup>2</sup>.



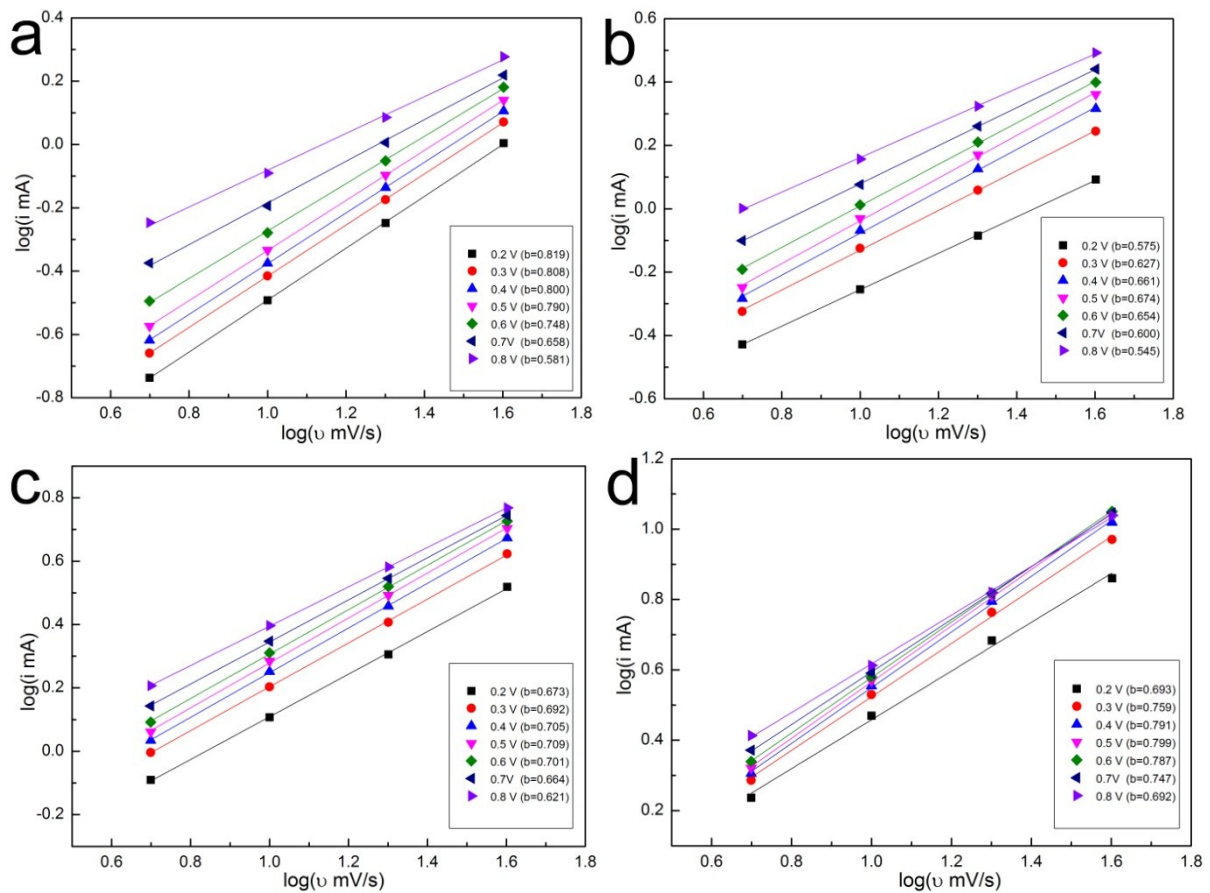

Figure S7.  $\log(i)$  vs  $\log(v)$  plot of the sample:(a) Ni-paper-5;(b) Ni-paper-10;(c) Ni-paper-20;(d) Ni-paper-30.

The contribution of the capacitive charge storage and the diffusion-controlled insertion processes could be quantitatively separated by the following formula:<sup>S11,S12</sup>

$$i(V) = k_1 v + k_2 v^{1/2} \quad (1)$$

$$i(V)/v^{1/2} = k_1 v^{1/2} + k_2 \quad (2)$$

where  $i(V)$  is the current at a given voltage,  $k_1$  and  $k_2$  are constants, and  $v$  is the scan rate.  $k_1 v$  and  $k_2 v^{1/2}$  represents the capacitive behaviour and diffusion-controlled insertion processes, respectively.  $k_1$  and  $k_2$  could be obtained by formula (2).

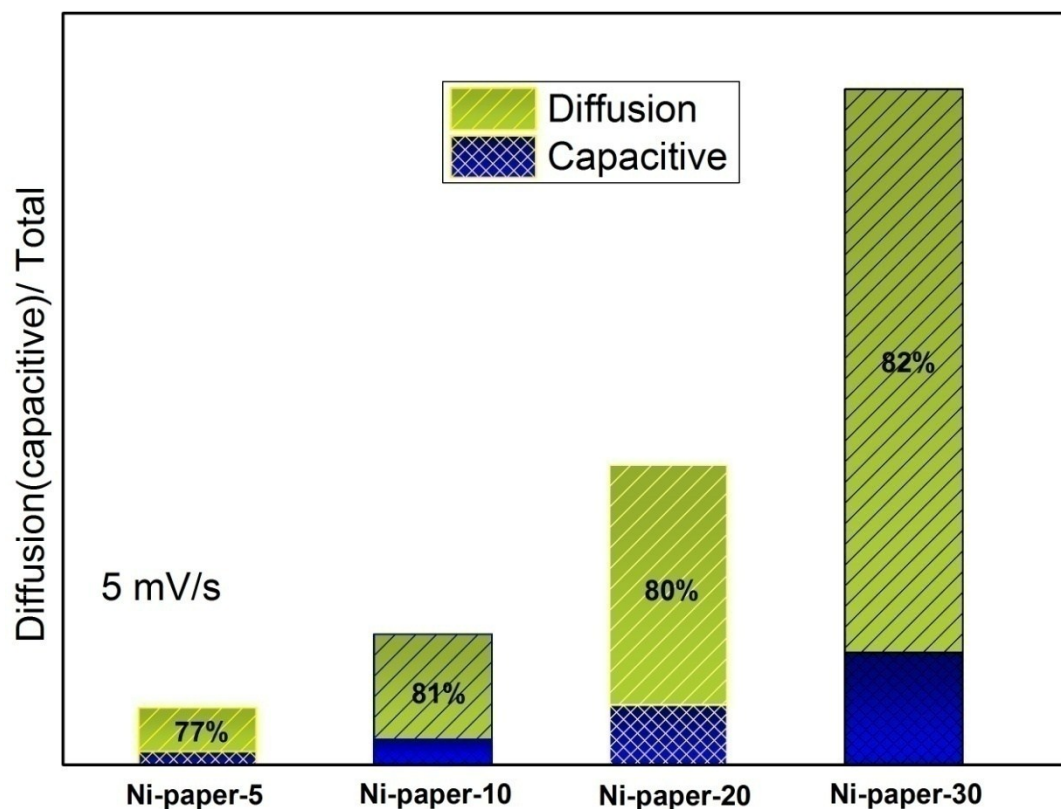

Figure S8. Diffusive and capacitive capacitance contribution of the samples at a scan rate 5 mV/s.

## References

- [S1] X. B. Lv, H. L. Zhang, F. F. Wang, Z. F. Hu, Y. X. Zhang, L. L. Zhang, R. Xie, J. Y. Ji, *CrystEngComm*, 2018, **20**, 1690.
- [S2] J. Y. Zhang, X. F. Yang, Y. B. He, Y. L. Bai, L. P. Kang, H. Xu, F. Shi, Z. B. Lei, Z. H. Liu, *J. Mater. Chem. A*, 2016, **4**, 9088.
- [S3] W. Yao, J. Wang, H. Li, Y. Lu, *Journal of Power Sources*, 2014, **247**, 824.
- [S4] K. B. Xu, S. J. Li, J. M. Yang, J. Q. Hu, *Journal of Colloid and Interface Science*, 2018, **513**, 448.
- [S5] X. Q. Feng, Y. H. Li, G. S. Chen, Z. Liu, X. H. Ning, A. P. Hu, Q. L. Tang, X. H. Chen, *Materials Letters*, 2018, **231**, 114.
- [S6] X. P. Chen, J. Wen, C. X. Zhao, Y. T. Li, N. Wang, *ChemistrySelect*, 2018, **3**, 9301.
- [S7] P. Y. Wang, C. Zhou, S. Wang, H. J. Kong, Y. N. Li, S. D. Li, S. M. Sun, *J Mater Sci: Mater Electron*, 2017, **28**, 12514.

- [S8] J. H. Zhou, N. N. Chen, Y. Ge, H. L. Zhu, X. M. Feng, R. Q. Liu, Y. W. Ma, L. H. Wang, W. H. Hou, *Sci China Mater*, 2018, **61**, 243.
- [S9] Y. M. Xie, L. J. Wang, Q. Y. Guo, J. Yin, J. Liu, L. Q. Fan, J. H. Wu, *J Mater Sci: Mater Electron*, 2018, **29**, 7957.
- [S10] S. C. Sekhar, G. Nagaraju, S. M. Cha, J. S. Yu, *Dalton Trans*, 2016, **45**, 19322.
- [S11] J. Wang, J. Polleux, J. Lim, B. Dunn, *J. Phys. Chem. C* 2007, **111**, 14925.
- [S12] H. S. Kim, J. B. Cook, H. Lin, J. S. Ko, S. H. Tolbert, V. Ozolins, B. Dunn, *Nat. Mater.* 2017, **16**, 454.
